# 1 **Comparative genomics of *Clostridium* species associated with** 2 **vacuum-packed meat spoilage.**

3 Nikola Palevich<sup>a</sup>, Faith P. Palevich<sup>a</sup>, Paul H. Maclean<sup>a</sup>, Eric Altermann<sup>a,b</sup>, Amanda Gardner<sup>a</sup>,  
4 Sara Burgess<sup>c</sup>, John Mills<sup>a</sup> and Gale Brightwell<sup>a</sup>.

5 <sup>a</sup>AgResearch Limited, Grasslands Research Centre, Palmerston North, New Zealand.

6 <sup>b</sup>Riddet Institute, Massey University, Palmerston North, New Zealand.

7 <sup>c</sup>Molecular Epidemiology and Veterinary Public Health Laboratory (mEpiLab), Infectious  
8 Disease Research Centre, School of Veterinary Science, Massey University, Palmerston North,  
9 New Zealand.

10 Corresponding author: E-mail: [nik.palevich@agresearch.co.nz](mailto:nik.palevich@agresearch.co.nz).

11 **KEYWORDS:** Genomics, Comparative genomics, *Clostridia*, *Clostridium estertheticum*,  
12 *Clostridium tagluense*, Vacuum-packaged meat, Spoilage flora, Carbohydrate metabolism.

## 13 **ABSTRACT**

14 Bacterial species belonging to the *Clostridium* genera have been recognized as causative agents  
15 of blown pack spoilage (BPS) in vacuum packed meat products. Whole-genome sequencing of  
16 six New Zealand psychrotolerant *Clostridium* isolates derived from three meat production animal  
17 types and their environments was performed to examine their roles in BPS. Comparative genome  
18 analyses have provided insight into the genomic diversity and physiology of these bacteria and  
19 divides *Clostridia* into two separate species clusters. BPS-associated *Clostridia* encode a large  
20 and diverse spectrum of degradative carbohydrate-active enzymes (CAZymes). In total, 516

21 glycoside hydrolases (GHs), 93 carbohydrate esterases (CEs), 21 polysaccharide lyases (PLs),  
22 434 glycosyl transferases (GTs) and 211 carbohydrate-binding protein modules (CBM) with  
23 predicted activities involved in the breakdown and transport of carbohydrates were identified.  
24 *Clostridia* genomes have different patterns of CAZyme families and vary greatly in the number  
25 of genes within each CAZy category, suggesting some level of functional redundancy. These  
26 results suggest that BPS-associated *Clostridia* occupy similar environmental niches but apply  
27 different carbohydrate metabolism strategies to be able to co-exist and cause meat spoilage.

## 28 **1.0. Introduction**

29 Despite stringent control measures for vacuum-packaging and regulation of storage temperatures  
30 for chilled fresh meat products destined for overseas markets, premature blown pack spoilage  
31 (BPS) of vacuum packaged meat can still occur. Spore-forming bacteria, namely psychrophilic  
32 and psychrotrophic *Clostridium* species (Mills et al., 2014), are common contaminants of food  
33 and the environment, and as such represent a major source of food poisoning and food spoilage.  
34 The global economic losses attributed to product spoilage and market access issues are  
35 significant and lead to reduced consumer confidence.

36 Numerous bacterial species belonging to the *Clostridium* genera have been associated as  
37 causative agents of blown pack spoilage (BPS) in vacuum packed meat products, including: *C.*  
38 *algidicarnis* (Lawson et al., 1994), *C. algidixylanolyticum* (Broda et al., 2000a), *C. gasigenes*  
39 (Broda et al., 2000b), *C. bowmanii* (Spring et al., 2003), *C. frigidicarnis* (Broda et al., 1999), *C.*  
40 *estertheticum* (Collins et al., 1992), *C. estertheticum* subspecies *laramiense* (Kalchayanand et al.,  
41 1993), *C. frigoris* (Spring et al., 2003) and *C. tagluense* (Suetin et al., 2009). The above-  
42 mentioned *Clostridium* species associated with BPS are typically characterized as Gram-positive,

43 slow-growing, spore-forming, psychotrophic anaerobes. Despite the importance of these spoilage  
44 microorganisms, studies are challenged by a lack of differential media or straightforward  
45 discriminatory methods for the specific identification of different spoilage *Clostridium* species.  
46 The currently available molecular tools such as, amplified rDNA (Ribosomal DNA) restriction  
47 analysis (ARDRA) and 16S rRNA gene sequencing (Brightwell and Horváth, 2018), are  
48 predominantly suitable for only pre-screening and community analysis of *Clostridium* species  
49 that may be associated with meat production animal types (cattle, sheep and deer) and their  
50 environments. With the advent of genome sequencing technology there is an opportunity to  
51 improve our basic knowledge of these important food-production and spoilage associated  
52 bacteria. Recently, several reference genomes have been made available (Palevich et al., 2020b;  
53 Palevich et al., 2020c; Palevich et al., 2020d; Palevich et al., 2020e; Palevich et al., 2020f), as  
54 well as those of characterized type strains *C. estertheticum* DSM 8809<sup>T</sup> (Yu et al., 2016), *C.*  
55 *tagluense* A121<sup>T</sup> (Suetin et al., 2009) and *C. estertheticum* subsp. *laramiense* DSM 14864<sup>T</sup>  
56 (Palevich et al., 2019c). In this study, we report a detailed primary-level pan-genome  
57 comparative analysis on our six isolates with the nine closely related and previously  
58 characterised meat spoilage-associated *Clostridium* isolates (*C. estertheticum*, *C. estertheticum*-  
59 like, *C. gasigenes*, *C. algidicarnis*, *C. frigidicarnis* and *C. tagluense*), to highlight their  
60 enzymatic machinery and metabolic capacities.

## 61 **2.0. Materials and Methods**

### 62 **2.1. Bacterial cultivation and growth conditions**

63 The methods for isolation and cultivation of the various meat spoilage associated *Clostridium*  
64 species described in the study has been previously detailed in Broda et al. (1998) and Broda et al.

65 (2000b). Strains DSM 14864<sup>T</sup> and DSM 8809<sup>T</sup> were acquired from the Leibniz Institute DSMZ-  
66 German Collection of Microorganisms and Cell Cultures. All cultures were retrieved from  
67 storage, grown anaerobically at 10°C in pre-reduced Peptone, Yeast Extract, Glucose, Starch  
68 broth (PYGS) (Lund et al., 1990) and culture purity checked by plating.

## 69 **2.2. Preparation of genomic DNA and whole-genome sequencing**

70 Genomic DNA was extracted from freshly grown cells using a modification of the phenol-  
71 chloroform procedure (Bouillaut et al., 2011). Specificity of genomic DNA was verified by  
72 automated Sanger sequencing of the 16S rRNA gene following PCR amplification from genomic  
73 DNA. Total DNA amounts were determined using a NanoDrop<sup>®</sup> ND-1000 (Thermo Scientific  
74 Inc.) and a Qubit Fluorometer dsDNA BR Kit (Invitrogen, USA), in accordance with the  
75 manufacturer's instructions. Genomic DNA integrity was verified by agarose gel electrophoresis  
76 and using a 2000 BioAnalyzer (Agilent, USA). The genomic DNA was mechanically sheared  
77 using a Nebulizer instrument (Invitrogen) to select fragments of approximately 550 bp. A DNA  
78 library was prepared using the Illumina TruSeq<sup>™</sup> Nano method and sequenced on the Illumina  
79 MiSeq platform with the 2× 250 bp paired-end (PE) reagent kit v2.

## 80 **2.3. Genome assembly and annotation**

81 The quality of the raw reads was checked in FastQC v0.11.5  
82 (<https://www.bioinformatics.babraham.ac.uk/projects/fastqc/>), the reads were trimmed with  
83 Trimmomatic v0.39 (<http://www.usadellab.org/cms/?page=trimmomatic>). A *de novo* assembly  
84 was performed using the A5-miseq pipeline v20169825 with standard parameters (Coil et al.,  
85 2014). Initial genome annotation was performed using GAMOLA2 (Altermann et al., 2017) for  
86 in preparation for submission to the National Center for Biotechnology Information (NCBI). The

87 software packages Diamond v0.9.21.122 (Buchfink et al., 2015) and InterProScan v5.36-75.0  
88 (Jones et al., 2014) were used to search the NCBI “nr” (non-redundant) database with the  
89 resulting protein set imported into BLAST2GO as implemented in the OmicsBox software  
90 package v1.1.164 (Conesa et al., 2005), where gene ontology terms and draft annotations were  
91 assigned to each protein.

92 In addition, genomes were annotated by the to the U.S. Department of Energy (DOE) Joint  
93 Genome Institute (JGI) Integrated Microbial Genomes (IMG) genome annotation pipeline, via  
94 direct submission to the IMG system (Mavromatis et al., 2009). Briefly, protein-coding genes  
95 (coding sequence [CDSs]) were identified using the Prodigal v2.6.3 program (102), followed by  
96 a round of automated and manual curation using the MGAP v5.0.12 pipeline (Huntemann et al.,  
97 2015). Functional annotation and additional analyses were performed within the Integrated  
98 Microbial Genomes Expert Review (IMG-ER) platform (Markowitz et al., 2009). All  
99 bioinformatics analyses were performed using default settings and parameters.

100 The genome sequences and associated data for all six *Clostridium* reported in this study were  
101 deposited in NCBI under the BioProject accession number [PRJNA574489](https://www.ncbi.nlm.nih.gov/bioproject/PRJNA574489). In addition, the data  
102 sets supporting the conclusions of this article are available through the IMG portal  
103 (<https://img.jgi.doe.gov/>).

## 104 **2.4. Comparative analysis of the genome data sets**

### 105 **2.4.1. Average nucleotide identity (ANI) computation**

106 ANI was used as a measure of genetic relatedness based on the gene content between the 15  
107 *Clostridium* genomes. ANI is a measure of nucleotide-level genomic similarity and was carried

108 out using a BLAST approach (ANIm) using the default parameters in the JSpecies software  
109 package v. 3.4.8 between each pair of genomes (Richter et al., 2016). To compare the ANIb  
110 values, a heat-map was generated using the heatmap.2 function in the gplots library of the  
111 statistics software package R (v. 3.5.2). In order to identify species ANI for the 15 *Clostridium*  
112 genomes that determine whether the genomes in a pair belong to the same species, only the  
113 subset of high-quality genome pairs were utilized and a ANI cutoff of  $\geq 96\%$  was used to define  
114 species.

#### 115 **2.4.2. Functional genome distribution (FGD) analysis**

116 FGD is a tool for comparative microbial genomics analysis and interpretation of the genetic  
117 diversity of bacteria (Altermann, 2012). FGD investigates the overall similarity levels between  
118 microbial genomes, based on the amino acid sequences of their predicted ORFeomes, which  
119 correspond to the coding sequences (CDSs) of the genes (open reading frames [ORFs]) in a  
120 genome, and ultimately defines the degree of similarity of the genomes. All 14 *Clostridium*  
121 genomes were downloaded in FASTA format from the IMG genome database (111),  
122 concatenated using a universal spacer-stop-spacer sequence, and automatically annotated using  
123 the GAMOLA2 software package (Altermann et al., 2017). The predicted ORFeomes of all  
124 genomes were subjected to an FGD analysis, and the resulting distance matrix was imported into  
125 MEGA6 (Tamura et al., 2013). The functional genome distribution was visualized using the  
126 unweighted pair group method with arithmetic mean (UPGMA) method (Jones et al., 1992). The  
127 procedure outlined here and for manual curation of the genome annotations has been detailed by  
128 Palevich et al. (Palevich et al., 2019a; Palevich et al., 2017; Palevich et al., 2019b; Palevich et  
129 al., 2020a).

### 130 **2.4.3. Determination of the core and pan-genomes**

131 The genes representative of the *Clostridium* core and pan-genomes were determined by  
132 performing a BLAST-based analysis using OrthoVenn v.2 (Wang et al., 2015) with default  
133 parameters, to compare the orthologous gene clusters within the *Clostridium* genomes. Briefly, if  
134 two proteins within a genome met the designated cut-off, they were clustered into one protein  
135 family. Protein families were extended via single-linkage clustering. If a protein family included  
136 proteins from all genomes in the comparison, the family was designated a core protein family.  
137 Subset genes, such as species group shared and unique subsets of genes within individual  
138 genomes, were identified by clustering the results from the core and pan-genome calculations.

### 139 **2.4.4. CAZyme annotation**

140 The putative proteomes of the 14 *Clostridium* data sets were subjected to automated annotation  
141 and assignment to CAZymes using the dbCAN resource CAZy family-specific hidden Markov  
142 models (HMMs) (104). An E value of  $<1e^{-3}$  for CAZymes based on family-specific HMMs was  
143 used as the cutoff for alignments shorter than 80 amino acids, while an E value of  $<1e^{-5}$  was used  
144 for alignments longer than 80 amino acids. These cut-off settings enabled short but significant  
145 CBM matches to be maintained. All dbCAN hits were clustered at a 100% sequence identity  
146 threshold using the CD-HIT Illumina algorithm to remove duplicates (Marchler-Bauer et al.,  
147 2012). All descriptions and classifications were compiled from CAZy (Cantarel et al., 2009), and  
148 the modular architectures of CAZymes and predicted proteins with multimodular CAZyme  
149 organizations in the genome data sets were determined by searching each query protein against  
150 the Pfam and Protein Data Bank (PDB) databases (Finn et al., 2013; Rose et al., 2013).

## 151 **3.0. Results**

### 152 **3.1. Comparative genomics**

153 NZ strain representatives; *C. tagluense* FP1 and *C. tagluense* FP2, *C. estertheticum* FP3 and FP4,  
154 *Clostridium* sp. M14, and type strain *C. estertheticum* subsp. *laramiense* DSM 14864<sup>T</sup> were  
155 selected for genome sequencing to examine their roles in BPS. The *de novo* assemblies of the six  
156 *Clostridium* genomes were all determined using Illumina MiSeq technology to generate on  
157 average 129 scaffolds with 172× coverage. The N50 values ranged between 43,169 bp (*C.*  
158 *estertheticum* FP4) to 757,921 bp (*Clostridium* sp. M14) with the largest scaffold length being  
159 1,669,648 bp (*Clostridium* sp. M14) and smallest of 133,780 bp (*C. estertheticum* FP4) in size.  
160 The draft genome sequences were composed of on average 4,924,744 bp and %G+C content of  
161 30.4% (Table 1). The presented *Clostridium* pan-genome consists of a total of 30,427 putative  
162 protein-coding genes (CDS) were predicted along with 21,420 genes with putative functions and  
163 an average of approximately 30% of CDS with unknown function predictions. Although the  
164 *Clostridium* pan-genome consists of only draft genomes, the presence of extrachromosomal  
165 elements (i.e. plasmids, megaplasmids and/or chromids) have been identified with the presence  
166 of plasmid replication initiation genes (*rep*) in all but the *C. estertheticum* FP3 genome.  
167 Furthermore, *rep* genes were identified in three or more gene clusters and on separate scaffolds  
168 in *C. estertheticum* subsp. *laramiense* DSM 14864<sup>T</sup>, *C. tagluense* FP1 and *C. tagluense* FP2,  
169 indicating the presence of multiple plasmids.

170 Comparative genome analyses were carried out on the six *Clostridium* strains isolated from our  
171 lab, along with an additional eight *Clostridium* strains representative of species associated with  
172 spoilage of meat (Table 1). Functional genome distribution (FGD) and average nucleotide



173 identity (ANI) were used to investigate the phylogenomic relationships. To examine the  
174 taxonomic classification of these *Clostridium* spp., the ANIb values were calculated between  
175 each pair of genomes and visualized using a heatmap (Fig. 1A). Those ANIb values greater than  
176 96% were enclosed by a red box, grouping them within the same taxon. The meat spoilage  
177 strains currently designated as *C. estertheticum* FP3, *C. estertheticum* FP4 and *Clostridium* sp.  
178 M14, all had ANIb values of less than 96% against all of the type strains, suggesting they are  
179 novel taxa.

180 The findings of the FGD analysis grouped all *Clostridium* species into two clusters, that placed  
181 *C. estertheticum* and *C. tagluense* strains together and clustered separately from all other  
182 *Clostridium* strains (Fig. 1B). Cluster 1 contained the sequences of the type strains of *C.*  
183 *estertheticum* (DSM 8809<sup>T</sup>), *C. estertheticum* subsp. *laramiense* (DSM 14864<sup>T</sup>) and *C. tagluense*  
184 (A121<sup>T</sup>) and four other *Clostridium* strains. Within Cluster 1, the currently designated *C.*  
185 *estertheticum* FP3 and especially FP4 clustered separately from the *C. estertheticum* and *C.*  
186 *tagluense* strains that may well represent new *Clostridium* species. Cluster 2 consisted of the  
187 sequences of seven *Clostridium* strains containing numerous type strains that represent other  
188 *Clostridia* associated with meat production but not BPS, in which *Clostridium* sp. M14 was  
189 found to be closely related to the *C. gasigenes* (DB1A<sup>T</sup>) type strain. Clusters 1 and 2 were well  
190 supported by bootstrap analyses, while Cluster 2 was more diverse, suggesting that the  
191 *Clostridium* strains can be divided into one relatively cohesive cluster (Cluster 1), while the  
192 larger Cluster 2 is a continuum of related species (Fig. 1).

193 The core, variable, and unique gene families present in the Cluster 1 *Clostridium* genomes were  
194 determined using BLAST analyses. Overall, 751 gene clusters, 545 orthologous clusters (at least  
195 contains two species) and a total of 206 single-copy orthologous gene families were found (Fig.

196 2), of which 292 represented the gene families shared among all five genomes, also referred to as  
197 the core genome set. The core genome set consisted mainly of genes encoding housekeeping,  
198 carbohydrate metabolism, and transport functions. The *C. estertheticum* subsp. *laramiense* (DSM  
199 14864<sup>T</sup>) and *C. estertheticum* FP3 genomes had the highest number of unique genes (n=26 and  
200 29), with predicted functions including sequence-specific DNA binding (GO:0043565;) and  
201 DNA restriction-modification system (GO:0009307).

### 202 **3.2. Carbohydrate-Active enZYme (CAZyme) profiling**

203 CAZyme profiling was analyzed using dbCAN2 (Zhang et al., 2018) and revealed that the  
204 *Clostridium* pan-genome is predicted to encode a total of 516 glycoside hydrolases (GHs), 93  
205 carbohydrate esterases (CEs), 21 polysaccharide lyases (PLs), 434 glycosyl transferases (GTs)  
206 and 211 carbohydrate-binding protein modules (CBM) families (Fig. 3). Within the *Clostridium*  
207 species, the strains generally had similar types of CAZymes, but with large variations in the  
208 absolute numbers of genes within each of their categories in the CAZy profiles. Overall,  
209 approximately 2% of the *Clostridium* pan-genome (483 CDSs) is predicted to encode either  
210 secreted (70) or intracellular (413) proteins dedicated to carbohydrate and even polysaccharide  
211 degradation. Pfam domain analysis of the most abundant GH (GH18, GH3, GH73, and GH13)  
212 and CE4 families showed that most did not contain signal peptide sequences and hence predicted  
213 to be located intracellularly. Interestingly, the enzymatic profiles of DSM 14864<sup>T</sup> and the well-  
214 characterized *C. estertheticum* DSM 8809<sup>T</sup> (ATCC 51377<sup>T</sup>) are almost identical, the pair was  
215 also atypical of those of their closest Cluster 1 relatives and were separated by CAZyme analysis.  
216 Also, similarities were observed among the *C. estertheticum* FP3 and FP4, also *C. tagluense* FP2  
217 and *Clostridium* sp. FP1 pairs of strains (Fig. 3). In addition, *Clostridium* sp. M14 had the most

218 unusual CAZy profile that appeared to be similar to that of the *C. estertheticum* strains, but with  
219 a particularly large number of CEs.

### 220 **3.3. Pathway analysis of carbohydrate metabolism**

221 The fermentation pathways in meat spoilage associated *Clostridium* predicted from gene content  
222 and metabolic pathway reconstruction are shown in Fig. 4. Overall, all of the genes encoding the  
223 enzymes required for fermenting hexoses through to pyruvate *via* an intact Embden-Meyerhof-  
224 Parnas (EMP) pathway were identified in the *Clostridium* pan-genome. The complete  
225 methylglyoxal shunt pathway for the alternative production of lactate and mediated by the  
226 enzymes: fructose-1,6-bisphosphate aldolase (*fbp*), methylglyoxal synthase (*mgsA*), glyoxylase  
227 (*gloA/B*), S-lactoylglutathione hydrolase, and *D*-lactate dehydrogenase (*ldhD*), converting *D*-  
228 fructose-1,6-bisphosphate to pyruvate (Fig. 4), was also investigated. Although lactate production  
229 as a fermentation end product was not assessed as part of this study, an incomplete set of  
230 methylglyoxal shunt pathway genes was only reported for *Clostridium* sp. M14 (lactate  
231 racemase). The genes encoding lactate dehydrogenase (*ldh*) have been identified and compared,  
232 in which the *ldh* gene encoding *L*-lactate dehydrogenase plays a key role in the production of *L*-  
233 lactate from pyruvate was present in all *Clostridium* genomes, but not *ldhD*.

### 234 **4.0 Discussion**

235 Approximately 200 clostridial species are currently recognized with at best only 10% of these  
236 validly characterized due to their phenotypic and metabolic similarities, but also due to the time-  
237 consuming and inconsistent cultural differentiation (Broda et al., 2003; Collins et al., 1994;  
238 Yutin and Galperin, 2013). Members of the genus *Clostridium* considered to be the major

239 components of the meat spoilage-associated microflora are currently divided into four species,  
240 represented by *C. estertheticum*, *C. gasigenes*, *C. algidicarnis*, and *C. tagluense*, (Brightwell and  
241 Clemens, 2012; Broda et al., 2002; Broda et al., 2009). All of these species belong to the  
242 genetically diverse Clostridiaceae family, within the order Clostridiales (Vos et al., 2011). To  
243 date, the FDG and ANI analyses reported in this work have provided the highest resolution of the  
244 phylogenomic associations for meat spoilage-associated *Clostridium* (Fig. 1), that have further  
245 highlighted previously reported inconsistencies between the 16S rRNA gene sequence and RFLP  
246 (restriction fragment length polymorphism) data (Brightwell and Horváth, 2018). Cluster 1 was  
247 phylogenetically cohesive, while the larger Cluster 2 appears to contain a continuum of related  
248 organisms.

249 The pan-genome analysis has revealed that while the Cluster 1 *Clostridium* genomes share about  
250 300 core genes, they also carry unique selections of genes drawn from the species' accessory  
251 genomes. Recently it has been proposed that gene loss and consequently gene gain *via* lateral  
252 transfer and gene duplication account for gene loss/gain and may occur at higher rates in  
253 organisms on the tips of the phylogenetic tree (Mcinerney et al., 2017). Examples of *Clostridium*  
254 strains that may exhibit such genome level plasticity include Cluster 1 strains *C. estertheticum*  
255 FP3 and FP4, and Cluster 2 strain *Clostridium* sp. M14. The collective genome cluster  
256 complement (3,495 genes) and the core genome (292 genes) of the cluster 1 *Clostridium* strains  
257 reflect a large reservoir of genetic diversity within this group (Fig. 2). The strict core genome  
258 represents 8.4% of the collective genome and represents the proposed minimum set of genes that  
259 allow the survival of *Clostridium* species in the vacuum-packaged meat products. The core  
260 genome includes genes encoding protein processing, folding and secretion, cellular processes,

261 energy metabolism and numerous poorly characterized genes (conserved hypothetical proteins,  
262 etc.).

263 The presence of an extrachromosomal element has recently been described for the *C.*  
264 *estertheticum* DSM 8809<sup>T</sup> type strain reference genome with the presence of a single 23,034 bp  
265 plasmid pDSM8009 (Yu et al., 2016). The present study has revealed that extrachromosomal  
266 plasmids are common in *Clostridium* species associated with meat spoilage. However, as these  
267 findings are based on strictly *in silico* analysis, further experimental validation will be required  
268 to confirm these findings such as *via* pulsed-field gel electrophoresis (PFGE) and with additional  
269 sequencing to improve the resolution of our genomes (Palevich, 2011; Palevich, 2016; Palevich  
270 et al., 2019b). The metabolic burden associated with sustaining the plasmid are made worthwhile  
271 for the host as they are likely to play a role as a channel for the horizontal exchange of genomic  
272 material and conveying advantageous functions (Jain et al., 2003). The types of essential traits  
273 that are transferred by plasmids include those implicated in amino acid, protein, and  
274 carbohydrate metabolism, as well as genes encoding degradative systems (Broda et al., 2000a),  
275 bacteriocin production (Jones et al., 2009), and resistance to antibiotics (Sebahia et al., 2006).  
276 These traits may improve their competitiveness by enabling faster genome replication through  
277 gene dosing effects and a higher growth rate of the bacterial cell. It is possible that  
278 extrachromosomal elements serve as vehicles for the exchange of genomic information between  
279 different strains and species or potentially to other genera such as lactic acid bacteria (LAB), that  
280 may provide a competitive advantage within their specific microbial ecosystem.

281 Comparative genome and glyco biome analyses have identified considerable variation in the  
282 conservation of orthologous gene families and CAZy profiles both between and within the meat

283 spoilage associated *Clostridium* species (Fig. 3). This suggests a degree of specialization within  
284 these bacteria, especially with the presence and abundance of a set of genes required for  
285 polysaccharide degradation such as: CE4 and CE6 acetyl xylan esterases (EC 3.1.1.72); CE9 N-  
286 acetylglucosamine 6-phosphate deacetylases (EC 3.5.1.25); and an assortment of multi-modal  
287 chitin or peptidoglycan cleaving enzymes consisting of GH18 (EC 3.2.1.14) with CBM50; and  
288 GH13 with either CBM48 glycogen, CBM41  $\alpha$ -glucans amylose, amylopectin, pullulan, and  
289 oligosaccharide, or CBM34 starch-binding modules. The abundance of GH and CE domain-  
290 containing CAZymes encoded within the *C. estertheticum* DSM 8809<sup>T</sup> and *C. estertheticum*  
291 *subsp. laramiense* DSM 14864<sup>T</sup> genomes, in particular their PL complements (PL1 and PL9  
292 pectate lyases (EC 4.2.2.2), PL4 and PL11 rhamnogalacturonan endolyases (EC 4.2.2.23)),  
293 suggests that they are specialist pectin and also xylan degraders. In addition to the CAZymes  
294 predicted to metabolize complex insoluble polysaccharides such as xylan and pectin, a large  
295 repertoire of enzymes were predicted to be encoded intracellularly (GH8, GH28, GH39, GH51,  
296 GH67, GH105, GH115, and CE2 families), in both bacteria. These findings are consistent with  
297 the phenotypic description and characterization of *Clostridium algidixylanolyticum* sp. nov. with  
298 the type strain SPL73<sup>T</sup> (DSM 12273<sup>T</sup>), a psychrotolerant, xylan-degrading, spore-forming  
299 *bacterium* isolated from vacuum-packed, temperature-abused raw lamb (Broda et al., 2000a).  
300 This suggests that certain *Clostridium* species associated with meat spoilage are well equipped to  
301 utilize a variety of complex oligo- and monosaccharides resulting from extracellular hydrolysis,  
302 as they are transported and metabolized within the cell as substrates for growth.  
303 The two subspecies of *C. estertheticum* currently recognized have previously been grouped into  
304 lactate producing and lactate non-producing strains (Spring et al., 2003; Yang et al., 2010). The  
305 diversity in fermentation products observed within each *C. estertheticum* subspecies suggests

306 differences in the metabolic pathways when grown on a range of substrates (Fig. 4). The  
307 metabolic pathway characterization analysis imply that certain *Clostridium* species may have the  
308 ability to switch substrate utilization from a simple monosaccharide substrate like glucose to a  
309 complex polysaccharide such as glycogen when grown in meat juice medium.

310 To explain the potential roles of *C. estertheticum* subsp. *laramiense* DSM 14864<sup>T</sup> and *C.*  
311 *estertheticum* DSM 8809<sup>T</sup> as specialized pectin fermenters due to their possession of PL CAZy  
312 family enzymes, we investigated the genes involved in uronic acid metabolism. In this pathway,  
313 broken-down pectin or uronic acid components on xylans are released in the form of  
314 galacturonates and glucuronates, which are metabolized via 2-keto-3-deoxygluconate (KDG)  
315 rather than *via* the EMP pathway. The KDG is then converted to 2-keto-3-deoxygluconate  
316 phosphate (KDGP) by 2-dehydro-3-deoxygluconokinase and is then converted to pyruvate and  
317 glyceraldehyde-3-phosphate (GAP) by 2-keto-3-deoxygluconate 6-phosphate aldolase (Fig. 4).

318 Both *C. estertheticum* genomes encode the enzymes required to convert both glucuronate and  
319 galacturonate through to pyruvate and potentially result in ATP production. Also in the case of  
320 *C. estertheticum* subsp. *laramiense* DSM 14864<sup>T</sup> and *C. estertheticum* DSM 8809<sup>T</sup>, their CAZy  
321 profiles and in particular their PL and CE content, may also account for the offensive odours and  
322 production of gas commonly associated with these species. Our comparative genomics findings  
323 provide further evidence for the need to include genome sequencing as a prerequisite for the  
324 description of new *Clostridium* species. For future work, further phenotypic characterization and  
325 biochemical investigation to differentiate the metabolic activity in vacuum-packaged meat  
326 spoilage associated *Clostridium* is warranted.

## 327 **5.0 Conclusions**

328 The genome sequences of the *Clostridium* species reported here is a valuable resource for future  
329 studies investigating the bacterial genetic mechanisms associated with BPS. In order to improve  
330 the phylogenetic resolution of the *Clostridium* genera and improve our limited knowledge of  
331 meat spoilage caused by *Clostridium* species, future efforts should focus on the generation of  
332 complete genomes across a wider range of *Clostridia* species.

## 333 **Acknowledgements**

334 The research outlined in this study was supported by the AgResearch Ltd Strategic Science  
335 Investment Fund (SSIF), contract A25980.

## 336 **Figure Legends**

337 **Figure 1.** (A) Heatmap based on average nucleotide identity (ANI<sub>b</sub>) between genomes of BPS-  
338 associated *Clostridia* (C.) strains. Dendrogram at the top and on the left are based on reciprocal  
339 pairwise comparison clustering calculated using Jspecies (Richter et al., 2016) and visualized  
340 using the heatmap.2 function in the R package ggplots2. Those ANI<sub>b</sub> values greater than 96%,  
341 grouping the *Clostridia* strains within the same taxon, were enclosed by a red box. (B)  
342 Functional genome distribution (FGD) analysis of BPS-associated *Clostridia*. The predicted  
343 ORFeomes of all 15 genomes were subjected to an FGD analysis (Altermann, 2012), and the  
344 resulting distance matrix was imported into MEGA6 (Tamura et al., 2013). The functional  
345 distribution was visualized using the UPGMA method (Jones et al., 1992). The tree is drawn to  
346 scale, with the branch lengths being in the same units as those of the functional distances used to  
347 infer the distribution tree. The bar represents the number of nucleotide substitutions per site.



348 **Figure 2.** Venn diagram showing the distribution of unique, group-specific, and core gene  
349 families among the cluster 1 *Clostridia* genomes. All *Clostridia* scaffolds with at least a single  
350 one-to-one ortholog shared among the genomes were compared using OrthoVenn v2 (Wang et  
351 al., 2015). The core genome is shown in the center circle. Each coloured intersect segment  
352 represents the number of gene families shared among the respective overlapping genomes, and  
353 the outermost numbers circled in red represent unique gene families for individual genomes.

354 **Figure 3.** Carbohydrate-Active Enzyme (CAZy) profiles of annotated *Clostridia* genomes.  
355 Analysis of the CAZy profiles were annotated using the dbCAN2 resource CAZy family-specific  
356 hidden Markov models (HMMs) (Zhang et al., 2018). The numbers and types of CAZyme  
357 modules or domains are represented as coloured horizontal bars.

358 **Figure 4.** Comparisons of gene presence/absence for enzymes involved in the carbohydrate  
359 metabolic pathways in *Clostridia* leading to the formation of butyrate, formate, acetate, and  
360 lactate. All metabolic pathways were compiled using information from the MetaCyc (Caspi et  
361 al., 2012) and KEGG (Kanehisa and Goto, 2000) databases. The presence or absence of genes  
362 encoding particular enzymes within genomes is indicated by full or empty cells, respectively in  
363 the panels. The order of genomes in the panels is described in the bottom right corner. Color  
364 schemes for the metabolism pathways are as follows: the formation of formate in blue, acetate in  
365 green, butyrate in purple, <sub>L</sub>-lactate in red, and <sub>D</sub>-lactate by the proposed methylglyoxal shunt in  
366 orange (Cooper, 1984). Abbreviations: DHAP, dihydroxyacetone phosphate; DKI, 5-keto-4-  
367 deoxyuronate; DKII, 2,5-diketo3-deoxygluconate; KDG, 2-keto-3-deoxygluconate; KDGP, 2-  
368 keto-3-deoxy-gluconate phosphate. Abbreviations for sugar transport systems are as follows:  
369 ABC, ATP binding cassette; MFS, major facilitator superfamily.

## 370 **References**

- 371 Altermann, E., 2012. Tracing lifestyle adaptation in prokaryotic genomes. *Frontiers in*  
372 *Microbiology* 3:1-17.
- 373 Altermann, E., Lu, J., and McCulloch, A., 2017. GAMOLA2, a comprehensive software package  
374 for the annotation and curation of draft and complete microbial genomes. *Frontiers in*  
375 *Microbiology* 8:346.
- 376 Bouillaut, L., McBride, S.M., and Sorg, J.A., 2011. Genetic manipulation of *Clostridium*  
377 *difficile*. *Current protocols in microbiology*:Unit.
- 378 Brightwell, G. and Clemens, R., 2012. Development and validation of a real-time PCR assay  
379 specific for *Clostridium estertheticum* and *C. estertheticum*-like psychrotolerant bacteria.  
380 *Meat science* 92:697-703.
- 381 Brightwell, G. and Horváth, K.M., 2018. Molecular discrimination of New Zealand sourced meat  
382 spoilage associated psychrotolerant *Clostridium* species by ARDRA and its comparison  
383 with 16s RNA gene sequencing. *Meat science* 138:23-27.
- 384 Broda, D., Bell, R., Boerema, J., and Musgrave, D., 2002. The abattoir source of culturable  
385 psychrophilic *Clostridium* spp. causing 'blown pack' spoilage of vacuum-packed chilled  
386 venison. *J. Appl. Microbiol.* 93:817-824.
- 387 Broda, D., Boerema, J., and Brightwell, G., 2009. Sources of psychrophilic and psychrotolerant  
388 clostridia causing spoilage of vacuum-packed chilled meats, as determined by PCR  
389 amplification procedure. *J. Appl. Microbiol.* 107:178-186.
- 390 Broda, D., Lawson, P., Bell, R., and Musgrave, D., 1999. *Clostridium frigidicarnis* sp. nov., a  
391 psychrotolerant bacterium associated with 'blown pack' spoilage of vacuum-packed  
392 meats. *International Journal of Systematic and Evolutionary Microbiology* 49:1539-  
393 1550.
- 394 Broda, D., Musgrave, D., and Bell, R., 2003. Molecular differentiation of clostridia associated  
395 with 'blown pack' spoilage of vacuum-packed meats using internal transcribed spacer  
396 polymorphism analysis. *International Journal of Food Microbiology* 84:71-77.
- 397 Broda, D., Saul, D., Bell, R., and Musgrave, D., 2000a. *Clostridium algidixylanolyticum* sp.  
398 nov., a psychrotolerant, xylan-degrading, spore-forming bacterium. *International Journal*  
399 *of Systematic and Evolutionary Microbiology* 50:623-631.
- 400 Broda, D., Saul, D., Lawson, P., Bell, R., and Musgrave, D., 2000b. *Clostridium gasigenes* sp.  
401 nov., a psychrophile causing spoilage of vacuum-packed meat. *International Journal of*  
402 *Systematic and Evolutionary Microbiology* 50:107-118.
- 403 Broda, D.M., De Lacy, K.M., and Bell, R.G., 1998. Efficacy of heat and ethanol spore treatments  
404 for the isolation of psychrotrophic *Clostridium* spp. associated with the spoilage of  
405 chilled vacuum-packed meats. *International Journal of Food Microbiology* 39:61-68.
- 406 Buchfink, B., Xie, C., and Huson, D.H., 2015. Fast and sensitive protein alignment using  
407 DIAMOND. *Nature Methods* 12:59.
- 408 Cantarel, B.L., Coutinho, P.M., Rancurel, C., Bernard, T., Lombard, V., and Henrissat, B., 2009.  
409 The Carbohydrate-Active EnZymes database (CAZy): an expert resource for  
410 glycogenomics. *Nucleic Acids Research* 37:D233-D238.
- 411 Caspi, R., Altman, T., Dreher, K., Fulcher, C.A., Subhraveti, P., Keseler, I.M., Kothari, A.,  
412 Krummenacker, M., Latendresse, M., Mueller, L.A., Ong, Q., Paley, S., Pujar, A.,  
413 Shearer, A.G., Travers, M., Weerasinghe, D., Zhang, P., and Karp, P.D., 2012. The

- 414 MetaCyc database of metabolic pathways and enzymes and the BioCyc collection of  
415 pathway/genome databases. *Nucleic Acids Research* 40:D742-753.
- 416 Coil, D., Jospin, G., and Darling, A.E., 2014. A5-miseq: an updated pipeline to assemble  
417 microbial genomes from Illumina MiSeq data. *Bioinformatics* 31:587-589.
- 418 Collins, M., Lawson, P., Willems, A., Cordoba, J., Fernandez-Garayzabal, J., Garcia, P., Cai, J.,  
419 Hippe, H., and Farrow, J., 1994. The phylogeny of the genus *Clostridium*: proposal of  
420 five new genera and eleven new species combinations. *International Journal of*  
421 *Systematic and Evolutionary Microbiology* 44:812-826.
- 422 Collins, M., Rodrigues, U., Dainty, R., Edwards, R., and Roberts, T., 1992. Taxonomic studies  
423 on a psychrophilic *Clostridium* from vacuum-packed beef: description of *Clostridium*  
424 *estertheticum* sp. nov. *FEMS Microbiology Letters* 96:235-239.
- 425 Conesa, A., Götz, S., García-Gómez, J.M., Terol, J., Talón, M., and Robles, M., 2005. Blast2GO:  
426 a universal tool for annotation, visualization and analysis in functional genomics  
427 research. *Bioinformatics* 21:3674-3676.
- 428 Cooper, R., 1984. Metabolism of methylglyoxal in microorganisms. *Annual Reviews in*  
429 *Microbiology* 38:49-68.
- 430 Finn, R.D., Bateman, A., Clements, J., Coggill, P., Eberhardt, R.Y., Eddy, S.R., Heger, A.,  
431 Hetherington, K., Holm, L., and Mistry, J., 2013. Pfam: the protein families database.  
432 *Nucleic Acids Research* 42:D222-D230.
- 433 Huntemann, M., Ivanova, N.N., Mavromatis, K., Tripp, H.J., Paez-Espino, D., Palaniappan, K.,  
434 Szeto, E., Pillay, M., Chen, I.-M.A., and Pati, A., 2015. The standard operating procedure  
435 of the DOE-JGI microbial genome annotation pipeline (MGAP v. 4). *Standards in*  
436 *Genomic Sciences* 10:1-6.
- 437 Jain, R., Rivera, M.C., Moore, J.E., and Lake, J.A., 2003. Horizontal gene transfer accelerates  
438 genome innovation and evolution. *Molecular Biology and Evolution* 20:1598-1602.
- 439 Jones, D.T., Taylor, W.R., and Thornton, J.M., 1992. The rapid generation of mutation data  
440 matrices from protein sequences. *Computer Applications in the Biosciences: CABIOS*  
441 8:275-282.
- 442 Jones, P., Binns, D., Chang, H.-Y., Fraser, M., Li, W., McAnulla, C., McWilliam, H., Maslen, J.,  
443 Mitchell, A., and Nuka, G., 2014. InterProScan 5: genome-scale protein function  
444 classification. *Bioinformatics* 30:1236-1240.
- 445 Jones, R.J., Zagorec, M., Brightwell, G., and Tagg, J.R., 2009. Inhibition by *Lactobacillus sakei*  
446 of other species in the flora of vacuum packaged raw meats during prolonged storage.  
447 *Food microbiology* 26:876-881.
- 448 Kalchayanand, N., Ray, B., and Field, R., 1993. Characteristics of psychrotrophic *Clostridium*  
449 *laramie* causing spoilage of vacuum-packaged refrigerated fresh and roasted beef.  
450 *Journal of food protection* 56:13-17.
- 451 Kanehisa, M. and Goto, S., 2000. KEGG: kyoto encyclopedia of genes and genomes. *Nucleic*  
452 *Acids Research* 28:27-30.
- 453 Lawson, P., Dainty, R., Kristiansen, N., Berg, J., and Collins, M., 1994. Characterization of a  
454 psychrotrophic *Clostridium* causing spoilage in vacuum-packed cooked pork:  
455 description of *Clostridium algidicarnis* sp. nov. *Letters in Applied Microbiology* 19:153-  
456 157.
- 457 Lund, B.M., Graham, A.F., George, S.M., and Brown, D., 1990. The combined effect of  
458 incubation temperature, pH and sorbic acid on the probability of growth of

- 459 non-proteolytic, type B *Clostridium botulinum*. *Journal of Applied Bacteriology* 69:481-  
460 492.
- 461 Marchler-Bauer, A., Zheng, C., Chitsaz, F., Derbyshire, M.K., Geer, L.Y., Geer, R.C., Gonzales,  
462 N.R., Gwadz, M., Hurwitz, D.I., and Lanczycki, C.J., 2012. CDD: conserved domains  
463 and protein three-dimensional structure. *Nucleic Acids Research* 41:D348–D352.
- 464 Markowitz, V.M., Mavromatis, K., Ivanova, N.N., Chen, I.-M.A., Chu, K., and Kyrpides, N.C.,  
465 2009. IMG ER: a system for microbial genome annotation expert review and curation.  
466 *Bioinformatics* 25:2271-2278.
- 467 Mavromatis, K., Ivanova, N.N., Chen, I.-M.A., Szeto, E., Markowitz, V.M., and Kyrpides, N.C.,  
468 2009. The DOE-JGI Standard operating procedure for the annotations of microbial  
469 genomes. *Standards in Genomic Sciences* 1:63-67.
- 470 McInerney, J.O., McNally, A., and O'Connell, M.J., 2017. Why prokaryotes have pangenomes.  
471 *Nature microbiology* 2:17040.
- 472 Mills, J., Donnison, A., and Brightwell, G., 2014. Factors affecting microbial spoilage and shelf-  
473 life of chilled vacuum-packed lamb transported to distant markets: A review. *Meat*  
474 *science* 98:71-80.
- 475 Palevich, N., 2011. Genome sequencing of rumen bacteria involved in lignocellulose digestion.  
476 MSc thesis. Massey University, Palmerston North, New Zealand, Master of Science in  
477 Genetics and Microbiology.
- 478 Palevich, N., 2016. Comparative genomics of *Butyrivibrio* and *Pseudobutyrvibrio* from the  
479 rumen. PhD dissertation. Massey University, Palmerston North, New Zealand, Doctor of  
480 Philosophy in Microbiology and Genetics.
- 481 Palevich, N., Kelly, W.J., Ganesh, S., Rakonjac, J., and Attwood, G.T., 2019a. *Butyrivibrio*  
482 *hungatei* MB2003 Competes Effectively for Soluble Sugars Released by *Butyrivibrio*  
483 *proteoclasticus* B316<sup>T</sup> during Growth on Xylan or Pectin. *Applied and Environmental*  
484 *Microbiology* 85:e02056-02018.
- 485 Palevich, N., Kelly, W.J., Leahy, S.C., Altermann, E., Rakonjac, J., and Attwood, G.T., 2017.  
486 The complete genome sequence of the rumen bacterium *Butyrivibrio hungatei* MB2003.  
487 *Standards in Genomic Sciences* 12:72.
- 488 Palevich, N., Kelly, W.J., Leahy, S.C., Denman, S., Altermann, E., Rakonjac, J., and Attwood,  
489 G.T., 2019b. Comparative genomics of rumen *Butyrivibrio* spp. uncovers a continuum of  
490 polysaccharide-degrading capabilities. *Applied and Environmental Microbiology* 86.
- 491 Palevich, N., Maclean, P.H., Kelly, W.J., Leahy, S.C., Rakonjac, J., and Attwood, G.T., 2020a.  
492 Complete Genome Sequence of the Polysaccharide-Degrading Rumen Bacterium  
493 *Pseudobutyrvibrio xylanivorans* MA3014 Reveals an Incomplete Glycolytic Pathway.  
494 *Genome biology and evolution*.
- 495 Palevich, N., Palevich, F.P., Maclean, P.H., Jauregui, R., Altermann, E., Mills, J., and  
496 Brightwell, G., 2019c. Draft genome sequence of *Clostridium estertheticum* subsp.  
497 *laramiense* DSM 14864T, isolated from spoiled uncooked beef. *Microbiology Resource*  
498 *Announcements* 8.
- 499 Palevich, N., Palevich, F.P., Maclean, P.H., Jauregui, R., Altermann, E., Mills, J., and  
500 Brightwell, G., 2020b. Draft Genome Sequence of *Clostridium estertheticum*-Like Strain  
501 FP3, Isolated from Spoiled Uncooked Lamb. *Microbiology Resource Announcements* 9.

- 502 Palevich, N., Palevich, F.P., Maclean, P.H., Jauregui, R., Altermann, E., Mills, J., and  
503 Brightwell, G., 2020c. Draft Genome Sequence of Clostridium estertheticum-like Strain  
504 FP4, Isolated from Spoiled Uncooked Lamb. *Microbiology Resource Announcements* 9.
- 505 Palevich, N., Palevich, F.P., Maclean, P.H., Jauregui, R., Altermann, E., Mills, J., and  
506 Brightwell, G., 2020d. Draft Genome Sequence of Clostridium sp. Strain FP1, with  
507 Similarity to Clostridium tagluense, Isolated from Spoiled Lamb. *Microbiology Resource*  
508 *Announcements* 9.
- 509 Palevich, N., Palevich, F.P., Maclean, P.H., Jauregui, R., Altermann, E., Mills, J., and  
510 Brightwell, G., 2020e. Draft genome sequence of psychrotolerant Clostridium sp. strain  
511 M14, isolated from spoiled uncooked venison. *Microbiology Resource Announcements* 9.
- 512 Palevich, N., Palevich, F.P., Maclean, P.H., Jauregui, R., Altermann, E., Mills, J., and  
513 Brightwell, G., 2020f. Whole-Genome Sequencing of Clostridium sp. Strain FP2,  
514 Isolated from Spoiled Venison. *Microbiology Resource Announcements* 9.
- 515 Richter, M., Rosselló-Móra, R., Oliver Glöckner, F., and Peplies, J., 2016. JSpeciesWS: a web  
516 server for prokaryotic species circumscription based on pairwise genome comparison.  
517 *Bioinformatics* 32:929-931.
- 518 Rose, P.W., Bi, C., Bluhm, W.F., Christie, C.H., Dimitropoulos, D., Dutta, S., Green, R.K.,  
519 Goodsell, D.S., Prlić, A., and Quesada, M., 2013. The RCSB Protein Data Bank: new  
520 resources for research and education. *Nucleic Acids Research* 41:D475-D482.
- 521 Sebahia, M., Wren, B.W., Mullany, P., Fairweather, N.F., Minton, N., Stabler, R., Thomson,  
522 N.R., Roberts, A.P., Cerdeño-Tárraga, A.M., and Wang, H., 2006. The multidrug-  
523 resistant human pathogen Clostridium difficile has a highly mobile, mosaic genome.  
524 *Nature Genetics* 38:779-786.
- 525 Spring, S., Merkhoffer, B., Weiss, N., Kroppenstedt, R.M., Hippe, H., and Stackebrandt, E.,  
526 2003. Characterization of novel psychrophilic clostridia from an Antarctic microbial mat:  
527 description of Clostridium frigoris sp. nov., Clostridium lacusfryxellense sp. nov.,  
528 Clostridium bowmanii sp. nov. and Clostridium psychrophilum sp. nov. and  
529 reclassification of Clostridium laramiense as Clostridium estertheticum subsp. laramiense  
530 subsp. nov. *Journal of Medical Microbiology* 53:1019-1029.
- 531 Suetin, S.V., Shcherbakova, V.A., Chuvilskaya, N.A., Rivkina, E.M., Suzina, N.E., Lysenko,  
532 A.M., and Gilichinsky, D.A., 2009. Clostridium tagluense sp. nov., a psychrotolerant,  
533 anaerobic, spore-forming bacterium from permafrost. *International Journal of Systematic*  
534 *and Evolutionary Microbiology* 59:1421-1426.
- 535 Tamura, K., Stecher, G., Peterson, D., Filipski, A., and Kumar, S., 2013. MEGA6: molecular  
536 evolutionary genetics analysis version 6.0. *Mol. Biol. Evol.* 30:2725-2729.
- 537 Vos, P., Garrity, G., Jones, D., Krieg, N.R., Ludwig, W., Rainey, F.A., Schleifer, K.-H., and  
538 Whitman, W.B., 2011. *Bergey's manual of systematic bacteriology: Volume 3: The*  
539 *Firmicutes*. Springer Science & Business Media.
- 540 Wang, Y., Coleman-Derr, D., Chen, G., and Gu, Y.Q., 2015. OrthoVenn: a web server for  
541 genome wide comparison and annotation of orthologous clusters across multiple species.  
542 *Nucleic Acids Research* 43:W78-W84.
- 543 Yang, X., Gill, C.O., and Balamurugan, S., 2010. Products of glucose and lactate fermentation,  
544 and utilization of amino acids by Clostridium estertheticum subsp. laramiense and  
545 estertheticum growing in meat juice medium. *Journal of food protection* 73:1348-1352.

- 546 Yu, Z., Gunn, L., Brennan, E., Reid, R., Wall, P.G., Gaora, P.Ó., Hurley, D., Bolton, D., and  
547 Fanning, S., 2016. Complete genome sequence of *Clostridium estertheticum* DSM 8809,  
548 a microbe identified in spoiled vacuum packed beef. *Frontiers in Microbiology* 7:1764.
- 549 Yutin, N. and Galperin, M.Y., 2013. A genomic update on clostridial phylogeny: G  
550 ram<sup>+</sup>negative spore formers and other misplaced clostridia. *Environmental Microbiology*  
551 15:2631-2641.
- 552 Zhang, H., Yohe, T., Huang, L., Entwistle, S., Wu, P., Yang, Z., Busk, P.K., Xu, Y., and Yin, Y.,  
553 2018. dbCAN2: a meta server for automated carbohydrate-active enzyme annotation.  
554 *Nucleic Acids Research* 46:W95-W101.

5 **Table 1.** Comparison of assembly and annotation statistics for the currently available BPS-associated *Clostridia* genomes.

|                                        | <i>C. tagluense</i> FP1 |                      | <i>C. tagluense</i> FP2 |                      | <i>C. estertheticum</i> FP3 |                      | <i>C. estertheticum</i> FP4      |                      | <i>Clostridium</i> sp. M14 |                      | <i>C. estertheticum</i> subsp. <i>laramiense</i> DSM 14864 <sup>T</sup> |                      | <i>C. estertheticum</i> DSM 8809 <sup>T</sup> |                      |
|----------------------------------------|-------------------------|----------------------|-------------------------|----------------------|-----------------------------|----------------------|----------------------------------|----------------------|----------------------------|----------------------|-------------------------------------------------------------------------|----------------------|-----------------------------------------------|----------------------|
|                                        | Value                   | % total <sup>a</sup> | Value                   | % total <sup>a</sup> | Value                       | % total <sup>a</sup> | Value                            | % total <sup>a</sup> | Value                      | % total <sup>a</sup> | Value                                                                   | % total <sup>a</sup> | Value                                         | % total <sup>a</sup> |
| <b>Genome Project Information</b>      |                         |                      |                         |                      |                             |                      |                                  |                      |                            |                      |                                                                         |                      |                                               |                      |
| Status                                 | Draft                   |                      | Draft                   |                      | Draft                       |                      | Draft                            |                      | Draft                      |                      | Draft                                                                   |                      | Complete                                      |                      |
| Isolation source                       | Lamb                    |                      | Venison                 |                      | Lamb                        |                      | Lamb                             |                      | Venison                    |                      | Beef                                                                    |                      | Beef                                          |                      |
| BioSample ID                           | SAMN14128649            |                      | SAMN14128650            |                      | SAMN14128651                |                      | SAMN14128652                     |                      | SAMN14128653               |                      | SAMN12859418                                                            |                      | SAMN04958870                                  |                      |
| BioProject ID                          |                         |                      |                         |                      |                             |                      | PRJNA574489                      |                      |                            |                      |                                                                         |                      | PRJNA320887                                   |                      |
| Assembly method                        | A5-miseq v. 20169825    |                      | A5-miseq v. 20169825    |                      | A5-miseq v. 20169825        |                      | A5-miseq v. 20169825             |                      | A5-miseq v. 20169825       |                      | A5-miseq v. 20169825                                                    |                      | HGAP2 v. 26/11/2015                           |                      |
| Genome coverage                        | 145x                    |                      | 115x                    |                      | 139x                        |                      | 242x                             |                      | 184x                       |                      | 202x                                                                    |                      | 522x                                          |                      |
| Sequencing technology                  |                         |                      |                         |                      |                             |                      | Illumina MiSeq                   |                      |                            |                      |                                                                         |                      | PacBio RS II                                  |                      |
| Annotation Method                      |                         |                      |                         |                      |                             |                      | IMG Annotation Pipeline v.5.0.15 |                      |                            |                      |                                                                         |                      |                                               |                      |
| <b>Genome Statistics</b>               |                         |                      |                         |                      |                             |                      |                                  |                      |                            |                      |                                                                         |                      |                                               |                      |
| Genome size (bp)                       | 5,379,343               |                      | 5,549,561               |                      | 5,555,543                   |                      | 4,088,187                        |                      | 3,981,244                  |                      | 4,994,588                                                               |                      | 4,785,613                                     |                      |
| DNA coding (bp)                        | 4,498,050               | 83.6                 | 4,630,094               | 83.4                 | 4,657,543                   | 83.8                 | 3,422,892                        | 83.7                 | 3,326,305                  | 83.6                 | 4,260,218                                                               | 85.3                 | 4,123,313                                     | 86.2                 |
| DNA G+C (bp)                           | 1,671,864               | 31.1                 | 1,715,103               | 30.9                 | 1,750,446                   | 31.5                 | 1,278,166                        | 31.3                 | 1,081,186                  | 27.2                 | 1,525,815                                                               | 30.6                 | 1,478,579                                     | 30.9                 |
| DNA replicons/scaffolds                | 209                     |                      | 110                     |                      | 85                          |                      | 251                              |                      | 35                         |                      | 84                                                                      |                      | 2                                             |                      |
| <b>Genome Annotations</b>              |                         |                      |                         |                      |                             |                      |                                  |                      |                            |                      |                                                                         |                      |                                               |                      |
| Total genes                            | 5,705                   |                      | 5,661                   |                      | 5,685                       |                      | 4,302                            |                      | 3,958                      |                      | 5,116                                                                   |                      | 4,656                                         |                      |
| Protein coding genes (CDS)             | 5,373                   | 94.2                 | 5,376                   | 95.0                 | 5,434                       | 95.6                 | 4,027                            | 93.6                 | 3,768                      | 95.2                 | 4,889                                                                   | 95.6                 | 4,498                                         | 96.6                 |
| RNA genes                              | 197                     | 3.5                  | 185                     | 3.3                  | 168                         | 3.0                  | 153                              | 3.6                  | 126                        | 3.2                  | 149                                                                     | 2.9                  | 158                                           | 3.4                  |
| rRNA genes                             | 91                      | 1.6                  | 80                      | 1.4                  | 59                          | 1.0                  | 55                               | 1.3                  | 41                         | 1.0                  | 54                                                                      | 1.1                  | 48                                            | 1.0                  |
| tRNA genes                             | 100                     | 1.8                  | 98                      | 1.7                  | 104                         | 1.8                  | 94                               | 2.2                  | 81                         | 2.0                  | 91                                                                      | 1.8                  | 89                                            | 1.9                  |
| CDS genes with function prediction     | 3,863                   | 67.7                 | 3,956                   | 69.9                 | 4,106                       | 72.2                 | 3,052                            | 70.9                 | 2,789                      | 70.5                 | 3,654                                                                   | 71.4                 | 3,390                                         | 72.8                 |
| CDS genes with unknown function        | 1,510                   | 26.5                 | 1,420                   | 25.1                 | 1,328                       | 23.4                 | 975                              | 22.7                 | 979                        | 24.7                 | 1,235                                                                   | 24.1                 | 1,108                                         | 23.8                 |
| Genes with enzymes                     | 986                     | 17.3                 | 1,030                   | 18.2                 | 1,102                       | 19.4                 | 841                              | 19.6                 | 845                        | 21.4                 | 1,055                                                                   | 20.6                 | 1,040                                         | 22.3                 |
| Genes connected to KEGG pathways       | 1,042                   | 18.3                 | 1,116                   | 19.7                 | 1,192                       | 21.0                 | 873                              | 20.3                 | 911                        | 23.0                 | 1,166                                                                   | 22.8                 | 1,138                                         | 24.4                 |
| Genes connected to KEGG Orthology (KO) | 2,050                   | 35.9                 | 2,137                   | 37.8                 | 2,219                       | 39.0                 | 1,745                            | 40.6                 | 1,634                      | 41.3                 | 2,123                                                                   | 41.5                 | 2,049                                         | 44.0                 |
| Genes connected to MetaCyc pathways    | 866                     | 15.2                 | 902                     | 15.9                 | 973                         | 17.1                 | 748                              | 17.4                 | 742                        | 18.8                 | 931                                                                     | 18.2                 | 921                                           | 19.8                 |
| Genes assigned to COGs                 | 3,776                   | 66.2                 | 3,843                   | 67.9                 | 4,015                       | 70.6                 | 2,997                            | 69.7                 | 2,706                      | 68.4                 | 3,668                                                                   | 71.7                 | 2,800                                         | 60.1                 |
| Genes with Pfam domains                | 3,891                   | 68.2                 | 4,005                   | 70.8                 | 4,121                       | 72.5                 | 3,031                            | 70.5                 | 2,803                      | 70.8                 | 3,738                                                                   | 73.1                 | 3,508                                         | 75.3                 |
| Genes with TIGRFam domains             | 1,315                   | 23.1                 | 1,347                   | 23.8                 | 1,333                       | 23.5                 | 1,135                            | 26.4                 | 1,131                      | 28.6                 | 1,344                                                                   | 26.3                 | 1,336                                         | 28.7                 |
| Genes with signal peptides             | 142                     | 2.5                  | 151                     | 2.7                  | 148                         | 2.6                  | 86                               | 2.0                  | 114                        | 2.9                  | 146                                                                     | 2.9                  | 197                                           | 4.2                  |
| Genes with transmembrane helices       | 1,327                   | 23.3                 | 1,381                   | 24.4                 | 1,370                       | 24.1                 | 1,050                            | 24.4                 | 910                        | 23.0                 | 1,331                                                                   | 26.0                 | 1,232                                         | 26.5                 |
| Horizontally transferred genes         | 210                     | 3.7                  | 252                     | 4.5                  | 364                         | 6.4                  | 201                              | 4.7                  | 61                         | 1.5                  | 35                                                                      | 0.7                  | 209                                           | 4.5                  |
| CRISPR count                           | 4                       |                      | 2                       |                      | -                           |                      | 2                                |                      | 6                          |                      | -                                                                       |                      | -                                             |                      |
| <b>Gene Cassettes and Clusters</b>     |                         |                      |                         |                      |                             |                      |                                  |                      |                            |                      |                                                                         |                      |                                               |                      |
| Chromosomal Cassette count             | 775                     |                      | 728                     |                      | 759                         |                      | 629                              |                      | 568                        |                      | 606                                                                     |                      | 505                                           |                      |
| Chromosomal Cassette genes             | 5,411                   | 94.9                 | 5,376                   | 95.0                 | 5,445                       | 95.8                 | 4,060                            | 94.4                 | 3,771                      | 95.3                 | 4,985                                                                   | 97.4                 | 4,564                                         | 98.0                 |
| COG clusters                           | 1,787                   | 31.3                 | 1,776                   | 31.4                 | 1,826                       | 32.1                 | 1,588                            | 36.9                 | 1,592                      | 40.2                 | 1,791                                                                   | 35.0                 | 1,518                                         | 32.6                 |
| Pfam clusters                          | 2,100                   | 36.8                 | 2,105                   | 37.2                 | 2,135                       | 37.6                 | 1,866                            | 43.4                 | 1,872                      | 47.3                 | 2,103                                                                   | 41.1                 | 2,069                                         | 44.4                 |
| TIGRFam clusters                       | 964                     | 16.9                 | 972                     | 17.2                 | 972                         | 17.1                 | 897                              | 20.9                 | 915                        | 23.1                 | 1,008                                                                   | 19.7                 | 1,078                                         | 23.2                 |
| Reference                              | Palevich et al. (2020c) |                      | Palevich et al. (2020e) |                      | Palevich et al. (2020a)     |                      | Palevich et al. (2020b)          |                      | Palevich et al. (2020d)    |                      | Palevich et al. (2019)                                                  |                      | Yu et al. (2016)                              |                      |

<sup>a</sup>The total is based on either the size of the genome in base pairs or the total number of genes or CDS in the annotated genome.

**A**

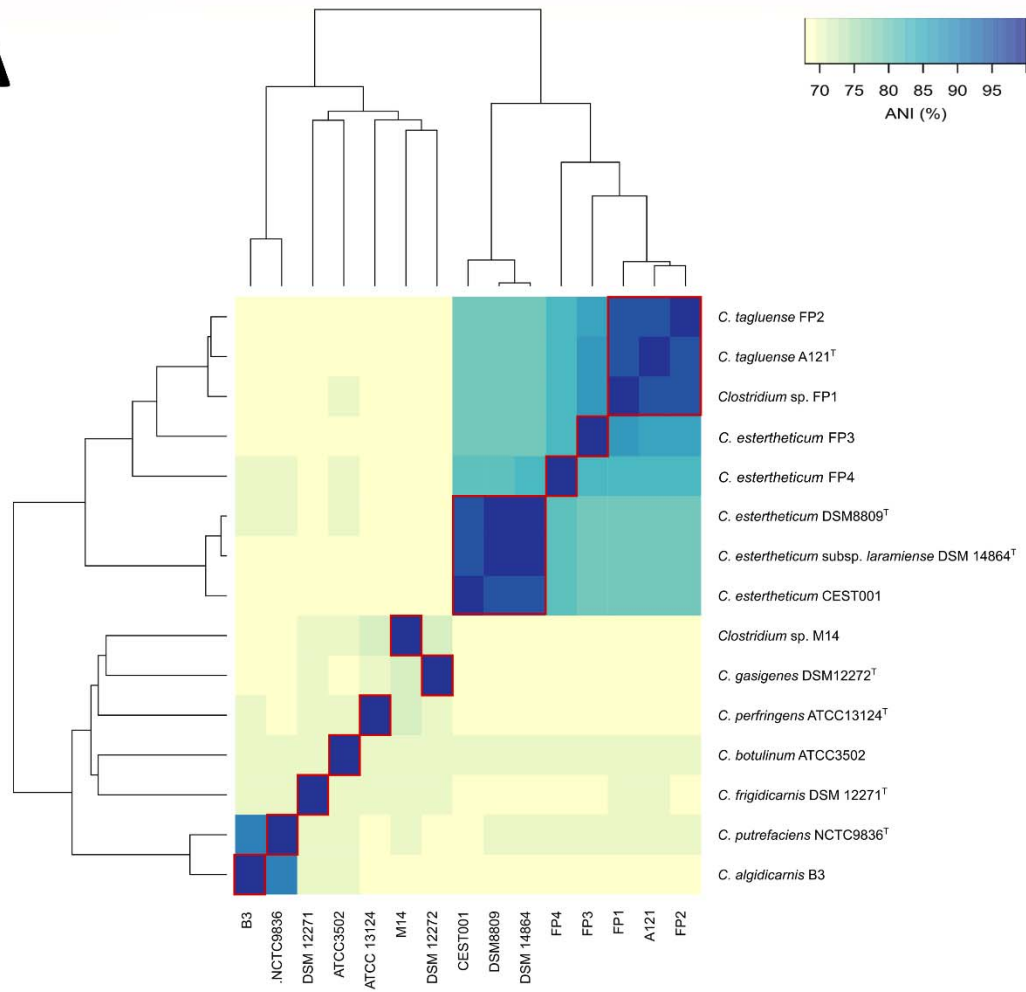

**B**

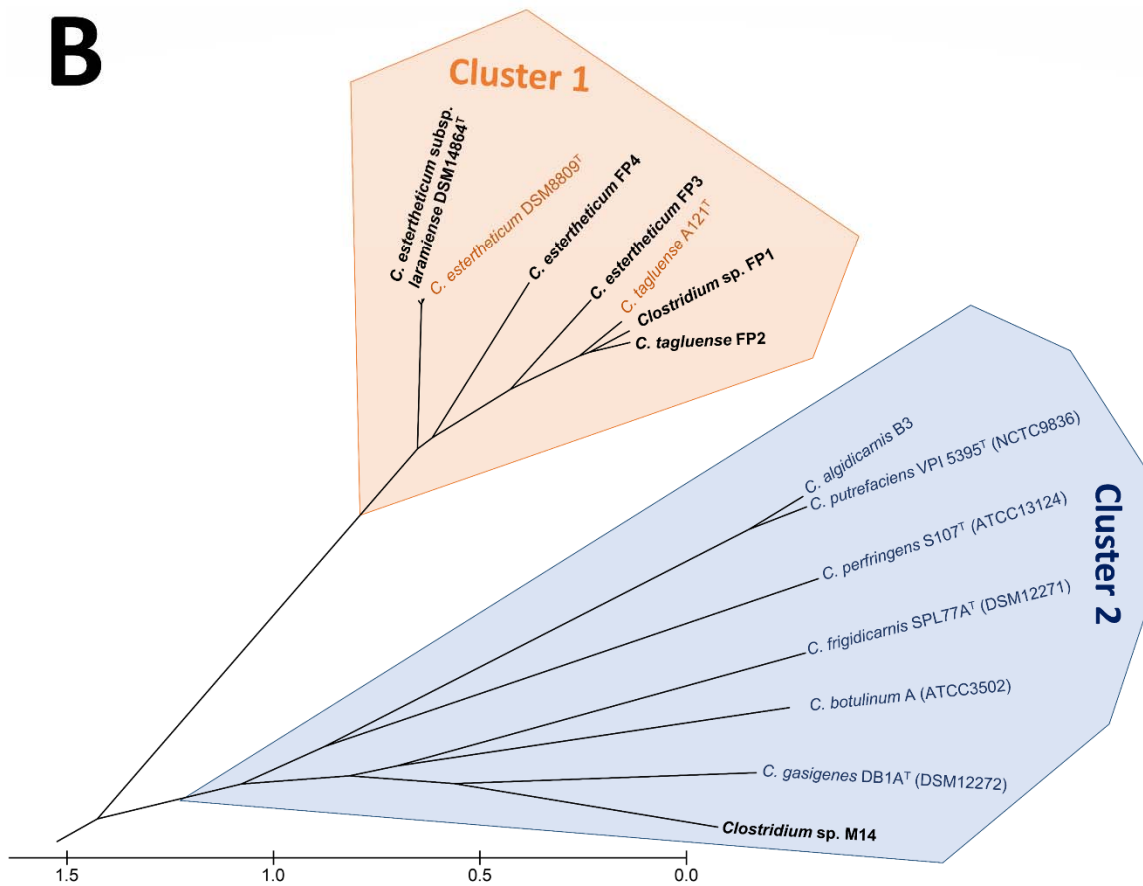

**Figure 1.**



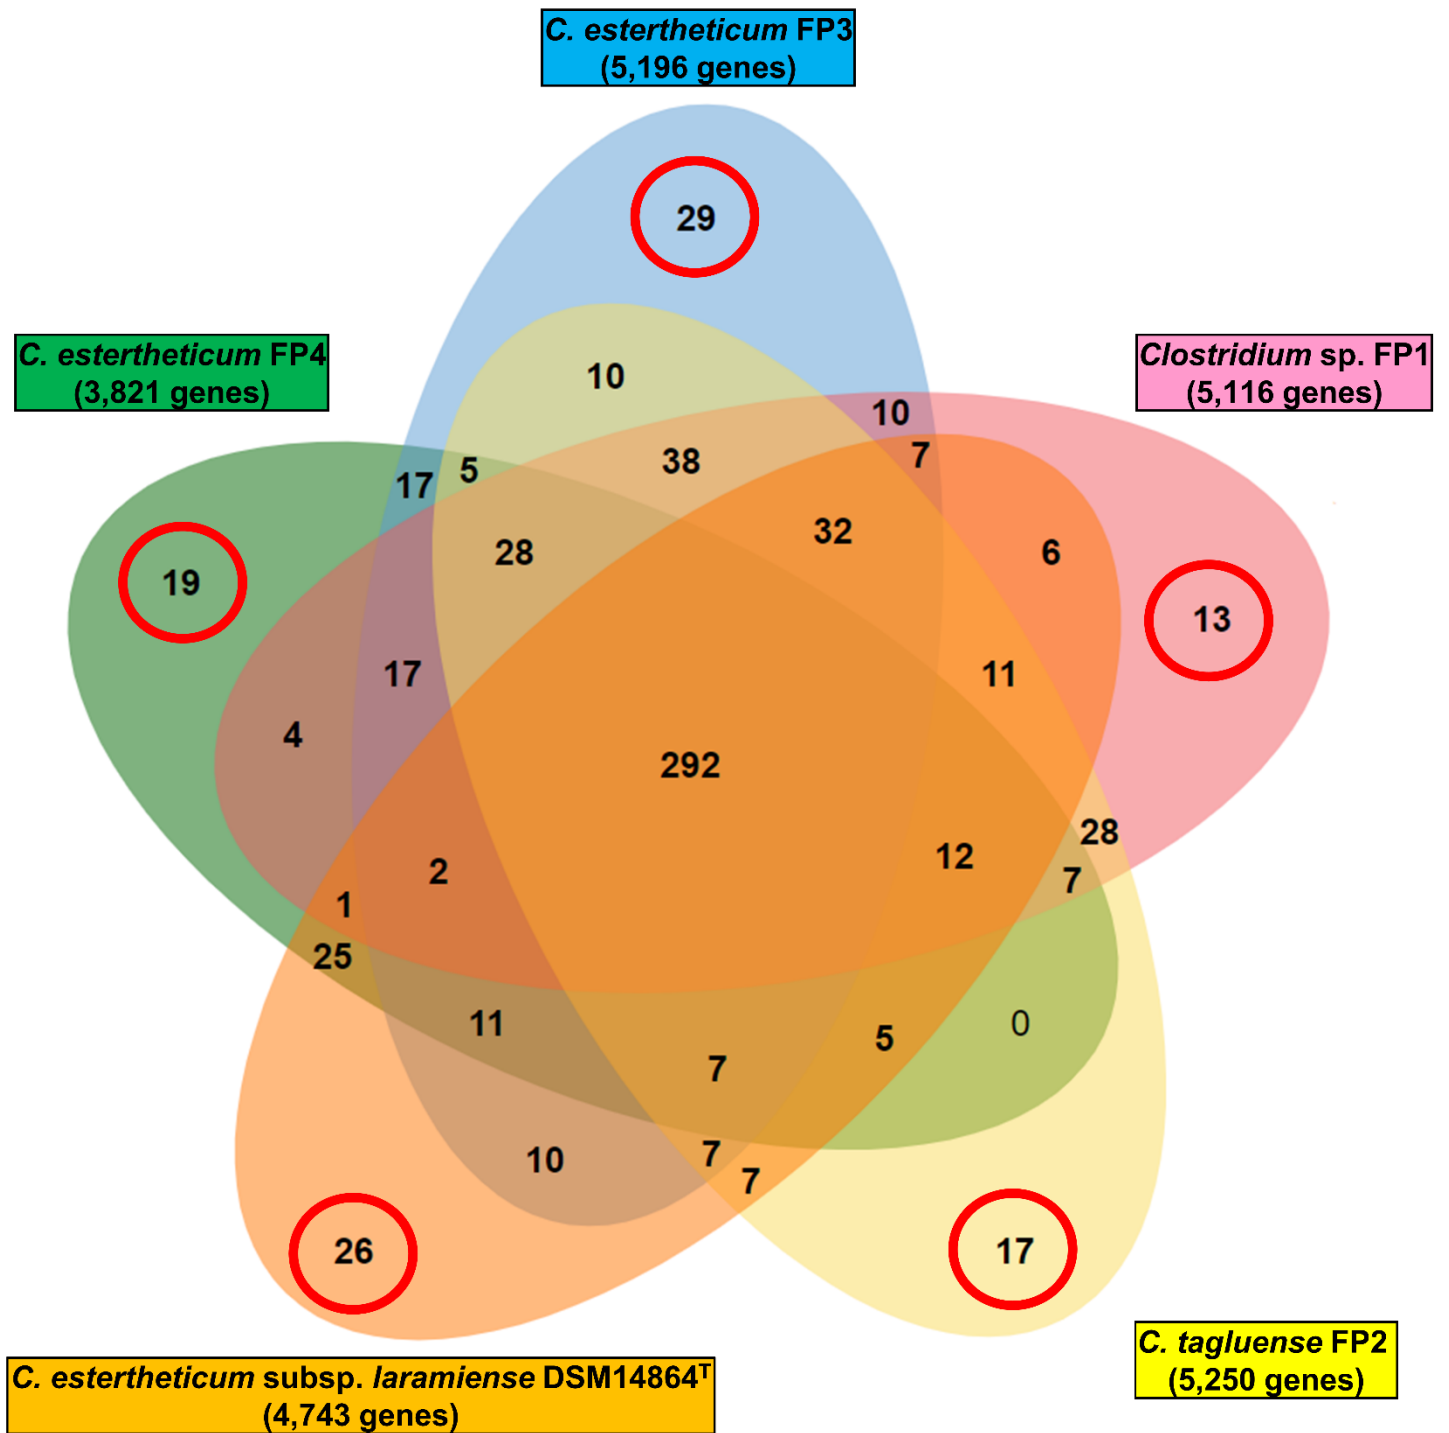

59  
50 **Figure 2.**

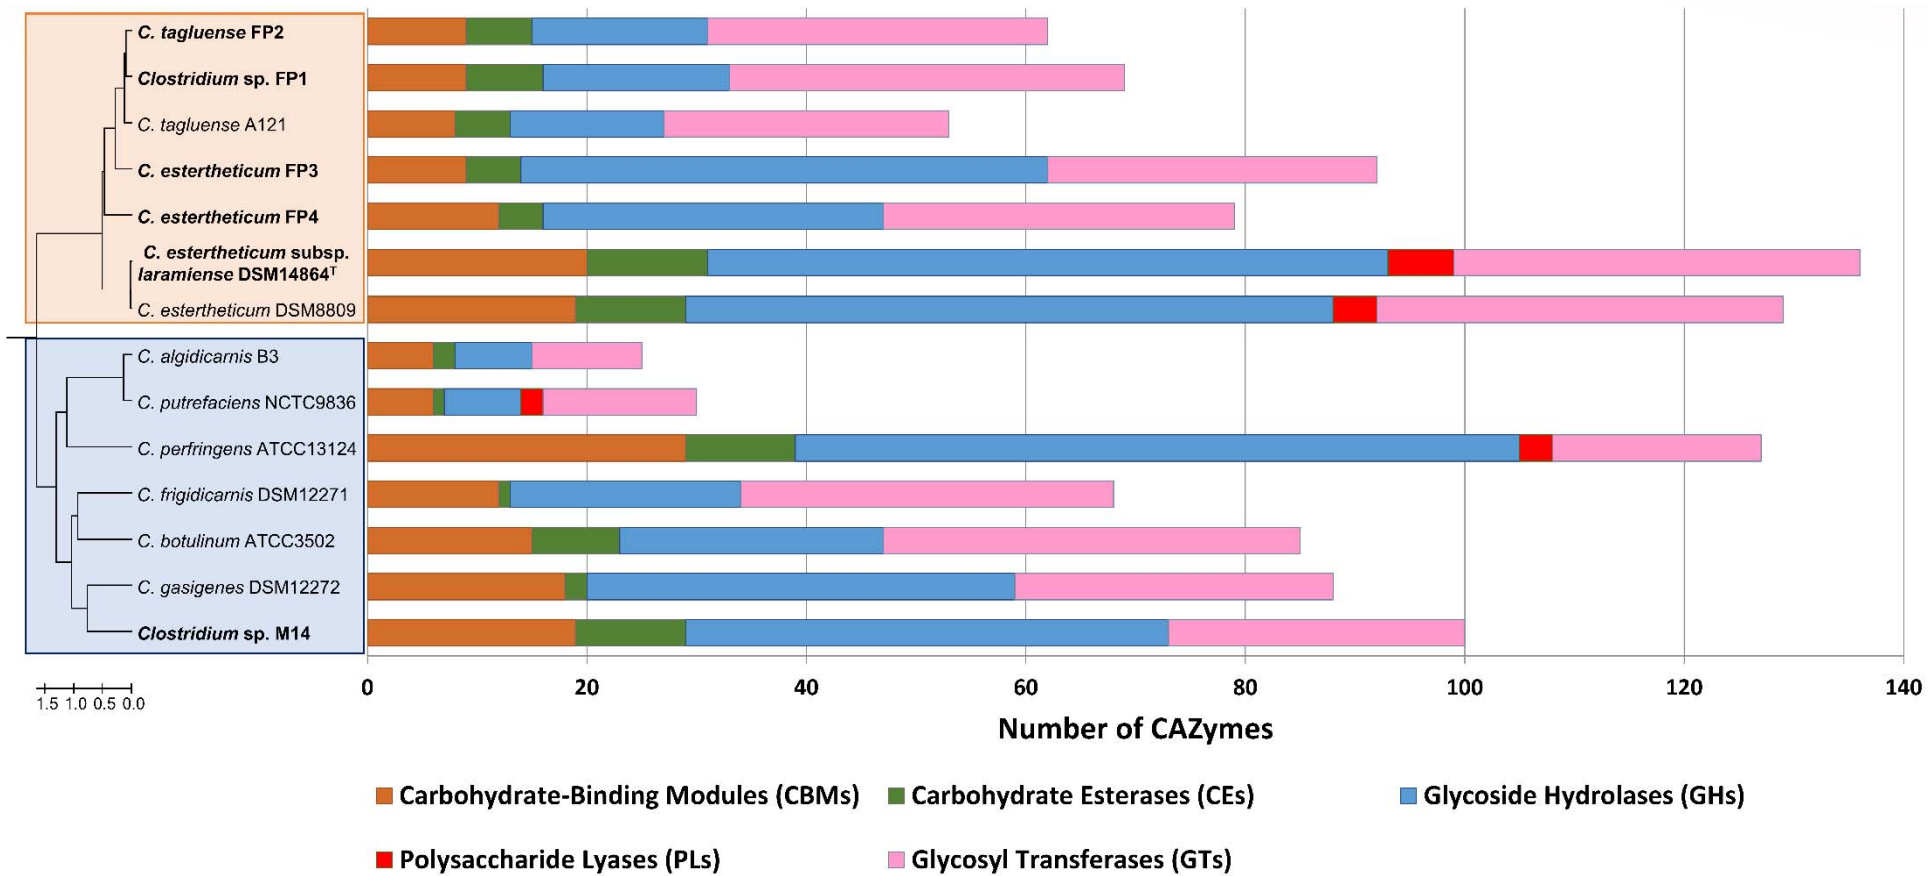

1  
2 **Figure 3.**

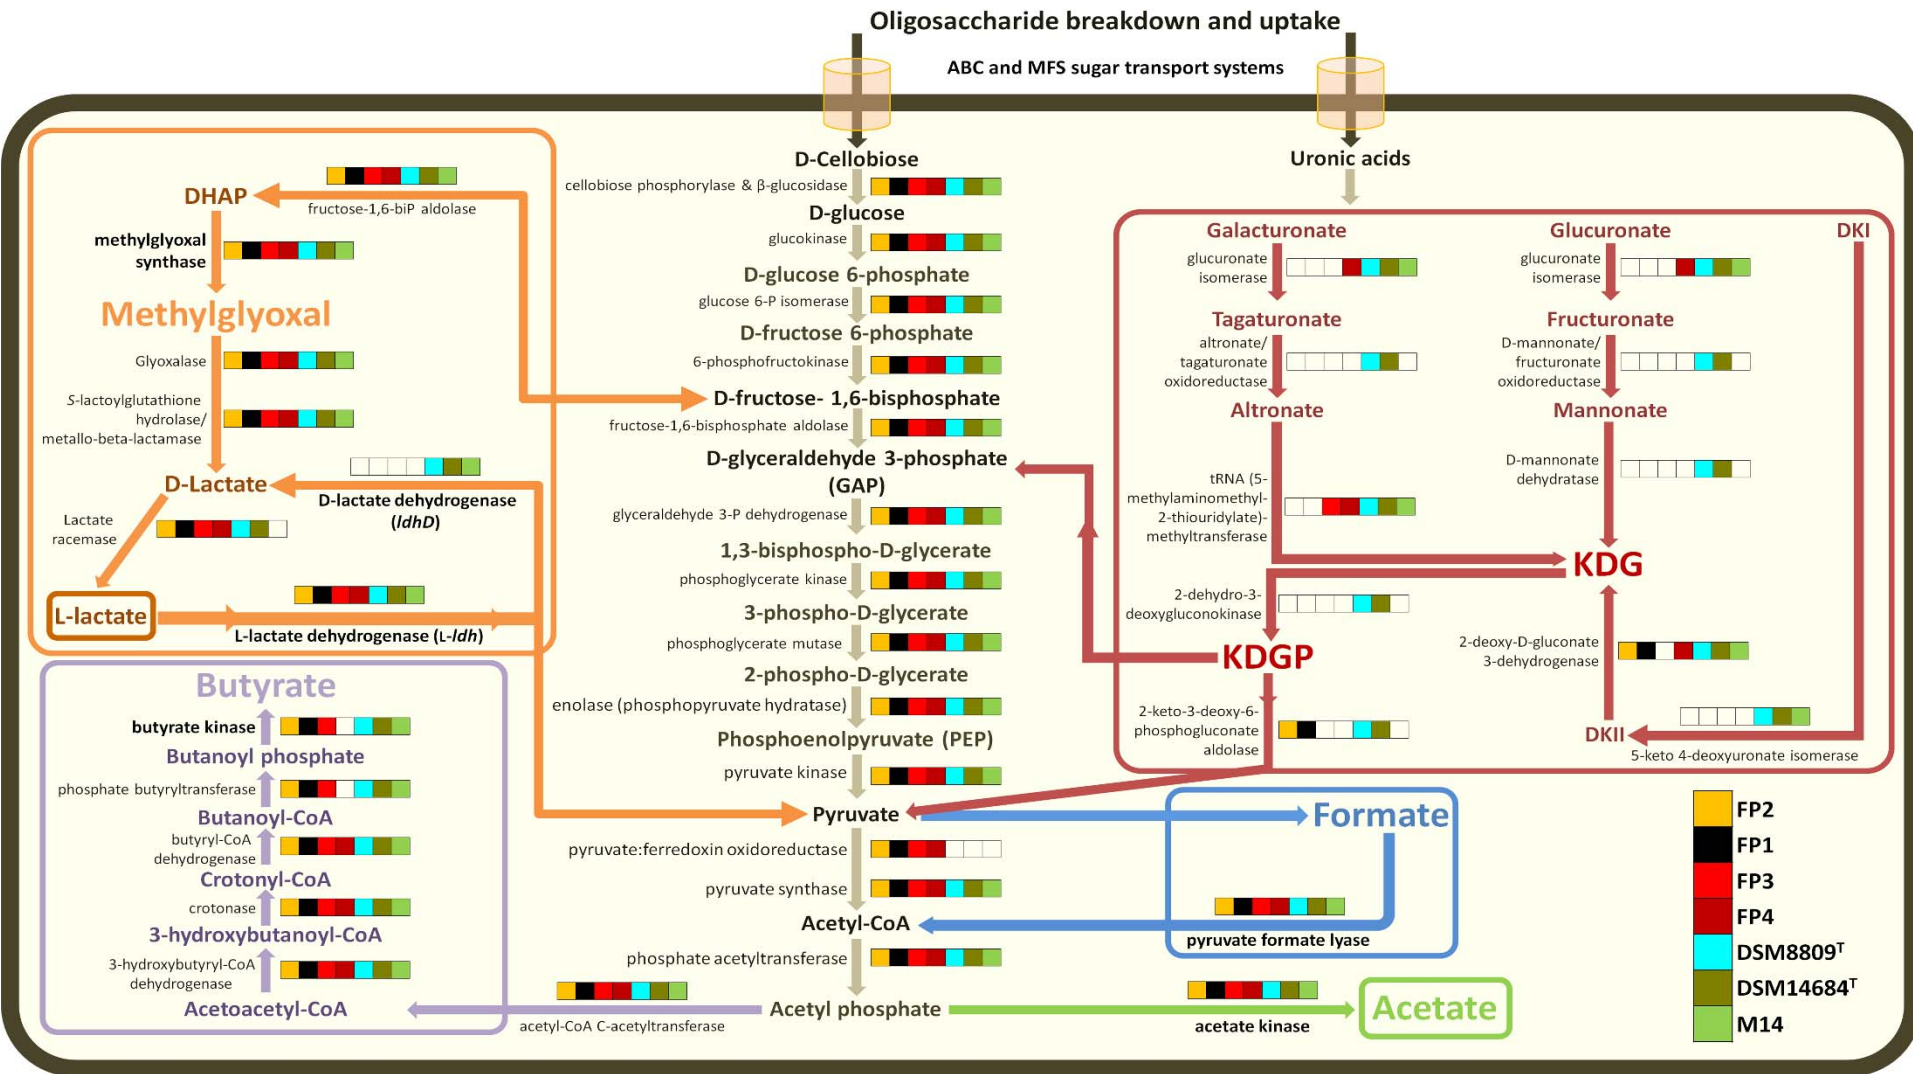

3  
4 **Figure 4.**
